# Supplementary material for: Fundamental bound on the persistence and capacity of short-term memory stored as graded persistent activity
Source: eLife journal article supplement (doi:10.7554/elife.22225), 2017-09-07
Supplement: supp [file elife-22225-supp-v1.zip]

Archive with 9 entries (9 files):
- elife_poa_e22225_Figure_3_figure_supplement_4.pdf
- elife_poa_e22225_Figure_5_figure_supplement_1.eps
- elife_poa_e22225_Figure_1_figure_supplement_1.eps
- elife_poa_e22225_Figure_3_figure_supplement_2.pdf
- elife_poa_e22225_Figure_1_Source_Data_File.zip
- elife_poa_e22225_Figure_3_figure_supplement_1.pdf
- elife_poa_e22225_Figure_5_figure_supplement_2.eps
- elife_poa_e22225_Transparent_Reporting_File.pdf
- elife_poa_e22225_Figure_3_figure_supplement_3.pdf
