# Supplementary material for: Fundamental bound on the persistence and capacity of short-term memory stored as graded persistent activity
Source: eLife journal article supplement (doi:10.7554/elife.22225), 2017-09-07
Supplement: supp [file elife-22225-supp-v1.zip › elife_poa_e22225_Transparent_Reporting_File.pdf]

## eLife's transparent reporting form

We encourage authors to provide detailed information *within their submission* to facilitate the interpretation and replication of experiments. If you have any questions, please contact us: [editorial@elifesciences.org](mailto:editorial@elifesciences.org).

### Sample-size estimation

- You should state whether an appropriate sample size was computed when the study was being designed
- You should state the statistical method of sample size computation and any required assumptions
- If no explicit power analysis was used, you should describe how you decided what sample (replicate) size (number) to use

Please outline where this information can be found within the submission (e.g., page numbers or figure legends), or explain why this information doesn't apply to your submission:

The current study is based on data collected and published previously (Pertsov et al 2017). The number of participants was selected to match the number of participants in a similar study (Pertsov et al 2013) that used similar methods. The current data is based on previously published studies, and we direct the reader to these studies for further read, but also include in this manuscript how this data is obtained (i.e., how the experiments are performed) in pages 3 and 22.

### Replicates

- You should report how often each experiment was performed
- You should include a definition of biological versus technical replication
- The data obtained should be provided and sufficient information should be provided to indicate the number of independent biological and/or technical replicates
- If you encountered any outliers, you should describe how these were handled
- Criteria for exclusion/inclusion of data should be clearly stated
- High-throughput sequence data should be uploaded before submission, with a private link for reviewers provided (these are available from both GEO and ArrayExpress)

Please outline where this information can be found within the submission (e.g., page numbers or figure legends), or explain why this information doesn't apply to your submission:

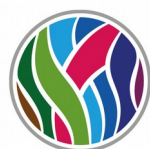

Each of the 10 participants performed between 11 and 15 blocks of 80 trials. Each block consisted of 20 trials for each of the 4 possible item numbers, consisting of 5 trials for each delay duration. No outliers were excluded. These experiments are explained in page 22 of the manuscript.

**Statistical reporting**

- Statistical analysis methods should be described and justified
- Raw data should be presented in figures whenever informative to do so (typically when N per group is less than 10)
- For each experiment, you should identify the statistical tests used, exact values of N, definitions of center, methods of multiple test correction, and dispersion and precision measures (e.g., mean, median, SD, SEM, confidence intervals; and, for the major substantive results, a measure of effect size (e.g., Pearson's r, Cohen's d)
- Report exact p-values wherever possible alongside the summary statistics and 95% confidence intervals. These should be reported for all key questions and not only when the p-value is less than 0.05.

Please outline where this information can be found within the submission (e.g., page numbers or figure legends), or explain why this information doesn't apply to your submission:

The data in the manuscript was published in Pertzov et al 2017. We have uploaded this raw data with this submission. Data is reported in Figure 1, where average of responses over subjects and trials along with standard error of the mean values are reported. In the current manuscript the statistical analysis is reported in pages 3 & 4. The exact p-values is reported when p was larger than 0.001. We also used Bayesian Information Criterion (BIC) when comparing different models, and this is described in pages 24, 25, and 36 of the manuscript.

(For large datasets, or papers with a very large number of statistical tests, you may upload a single table file with tests, Ns, etc., with reference to page numbers in the manuscript.)

**Additional data files ("source data")**

- We encourage you to upload relevant additional data files, such as numerical data that are represented as a graph in a figure, or as a summary table
- Where provided, these should be in the most useful format, and they can be uploaded as "Source data" files linked to a main figure or table
- Include model definition files including the full list of parameters used
- Include code used for data analysis (e.g., R, MatLab)
- Avoid stating that data files are "available upon request"



eLIFE

1st Floor  
24 Hills Road  
Cambridge CB2 1JP, UK

P 01223 855340  
W [elifesciences.org](http://elifesciences.org)  
T @elife

Please indicate the figures or tables for which source data files have been provided:

The raw data collected is uploaded with the submission. This dataset consists of responses of 10 subjects as described above.
