# Supplementary figures and images for: Fundamental bound on the persistence and capacity of short-term memory stored as graded persistent activity
Source: eLife journal article supplement (doi:10.7554/elife.22225), 2017-09-07

**A**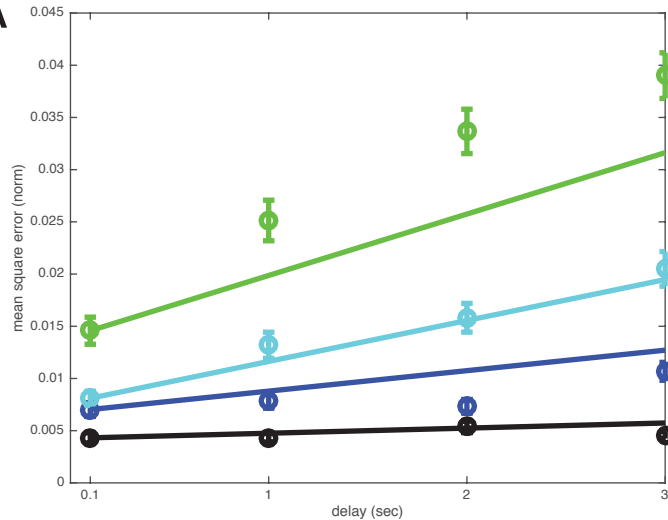**B**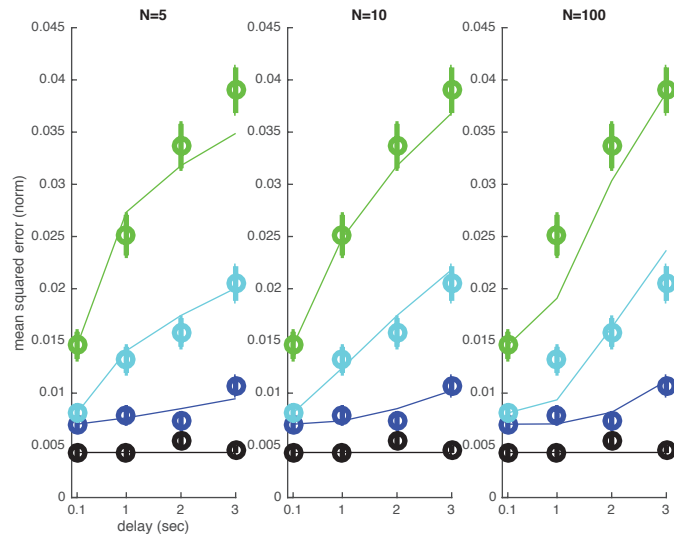

Supplement: supp [file elife-22225-supp-v1.zip › elife_poa_e22225_Figure_3_figure_supplement_4.pdf]

A

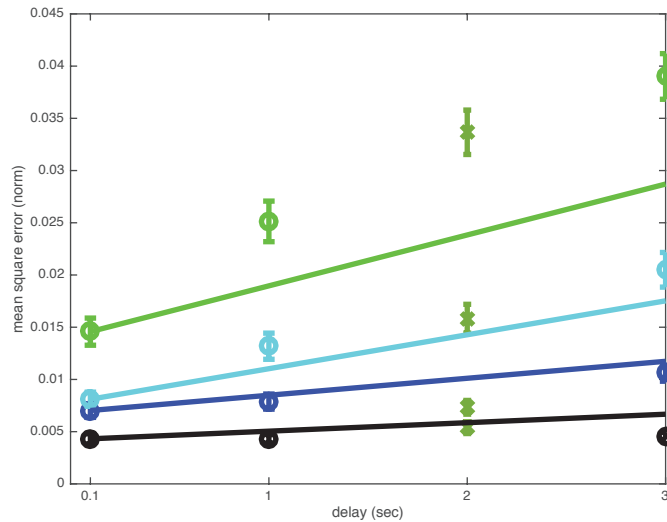

B

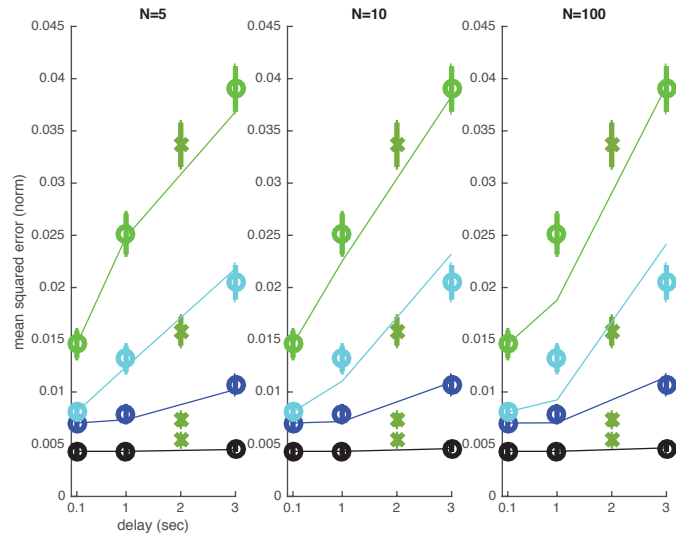

Supplement: supp [file elife-22225-supp-v1.zip › elife_poa_e22225_Figure_3_figure_supplement_2.pdf]

**A**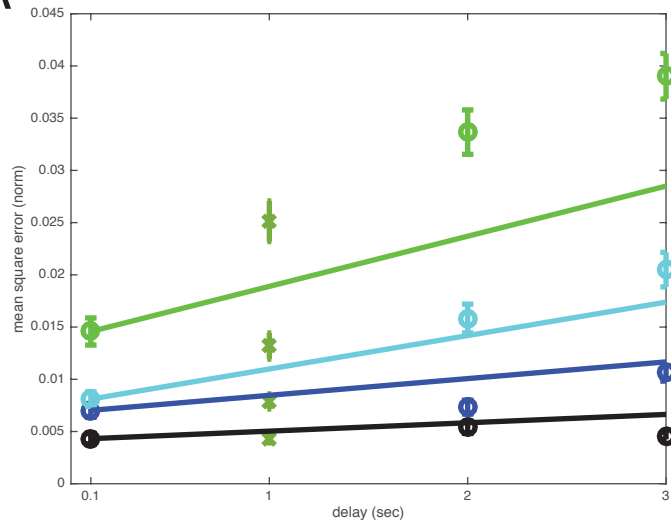**B**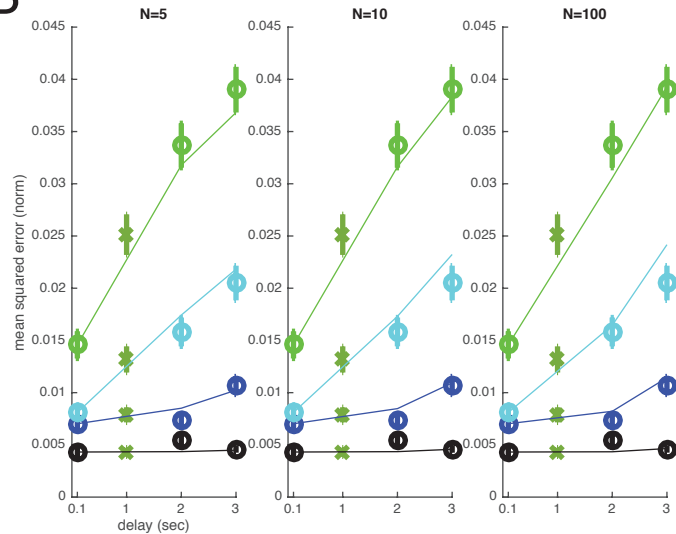

Supplement: supp [file elife-22225-supp-v1.zip › elife_poa_e22225_Figure_3_figure_supplement_1.pdf]

**A**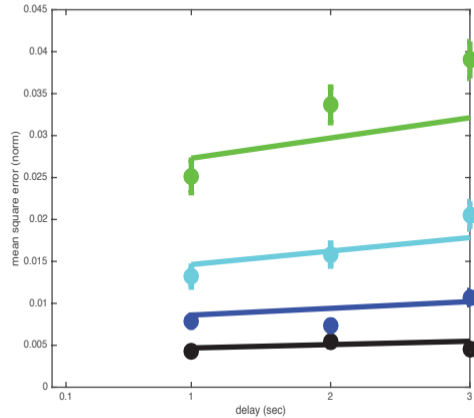**B**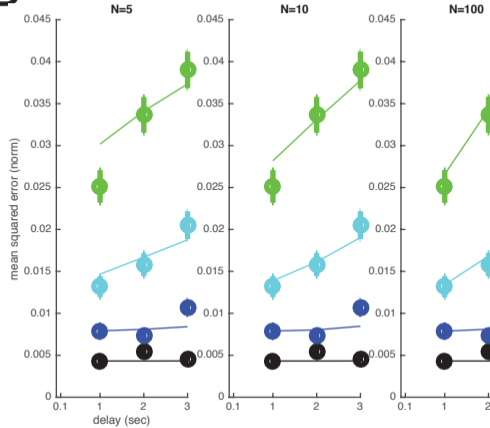**C**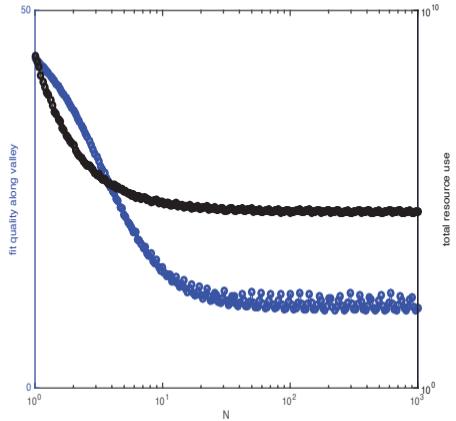

Supplement: supp [file elife-22225-supp-v1.zip › elife_poa_e22225_Figure_3_figure_supplement_3.pdf]
